# Supplementary material
Source: PubMed Central journal article supplement (PMC6408318)
Supplement: mmc1.pdf [file mmc1.pdf]

## Supplemental Data

### **Bi-allelic Variants in *TONSL* Cause SPONASTRIME Dysplasia and a Spectrum of Skeletal Dysplasia Phenotypes**

**Lindsay C. Burrage, John J. Reynolds, Nissan Vida Baratang, Jennifer B. Phillips, Jeremy Wegner, Ashley McFarquhar, Martin R. Higgs, Audrey E. Christiansen, Denise G. Lanza, John R. Seavitt, Mahim Jain, Xiaohui Li, David A. Parry, Vandana Raman, David Chitayat, Ivan K. Chinn, Alison A. Bertuch, Lefkothea Karaviti, Alan E. Schlesinger, Dawn Earl, Michael Bamshad, Ravi Savarirayan, Harsha Doddapaneni, Donna Muzny, Shalini N. Jhangiani, Christine M. Eng, Richard A. Gibbs, Weimin Bi, Lisa Emrick, Jill A. Rosenfeld, John Postlethwait, Monte Westerfield, Mary E. Dickinson, Arthur L. Beaudet, Emmanuelle Ranza, Celine Huber, Valérie Cormier-Daire, Wei Shen, Rong Mao, Jason D. Heaney, Jordan S. Orange, University of Washington Center for Mendelian Genomics, Undiagnosed Diseases Network, Débora Bertola, Guilherme L. Yamamoto, Wagner A.R. Baratela, Merlin G. Butler, Asim Ali, Mehdi Adeli, Daniel H. Cohn, Deborah Krakow, Andrew P. Jackson, Melissa Lees, Amaka C. Offiah, Colleen M. Carlston, John C. Carey, Grant S. Stewart, Carlos A. Bacino, Philippe M. Campeau, and Brendan Lee**

**A**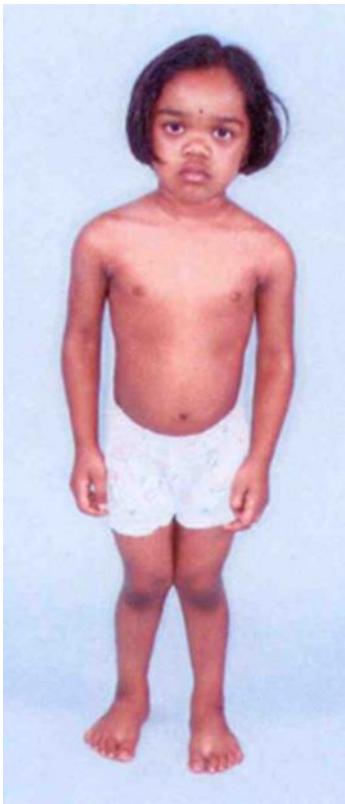**B**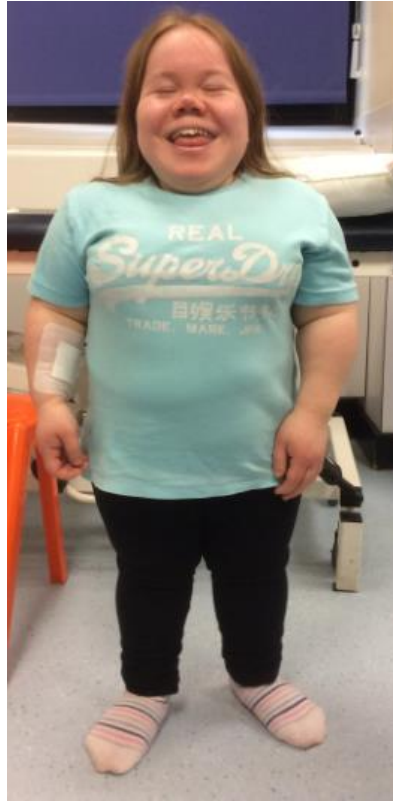**C**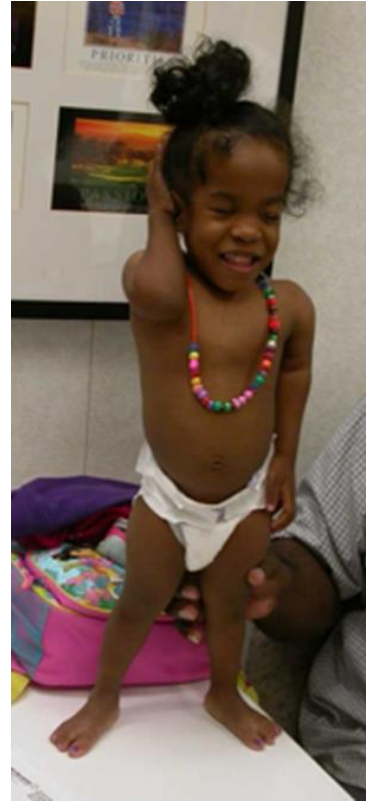**D**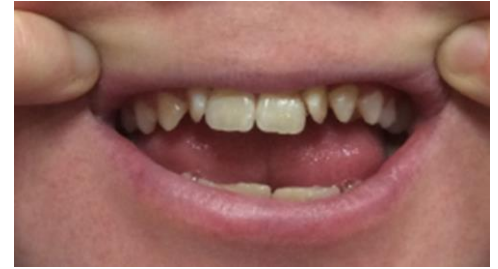**E**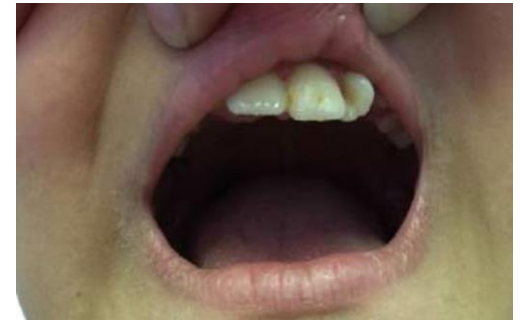

Figure S1. Additional photographs. (A) Subject 2 at 6 years of age showing rhizomelia, mesomelia and genu valgum. (B) Subject 4 at 22 years of age. Additional radiographs and photographs have been published previously<sup>8</sup>. (C) Subject 6 at 12 years of age. (D) Twisted lateral incisors observed in subject 4 (bilateral). (E) Twisted lateral incisor observed in subject 7-2 (unilateral).

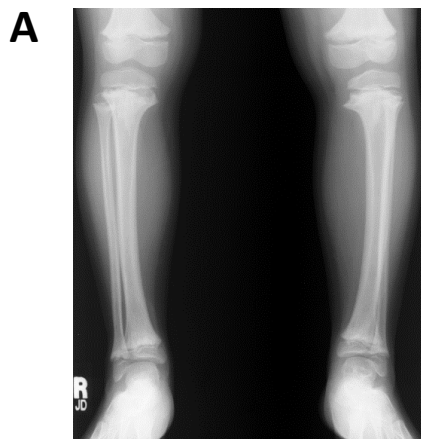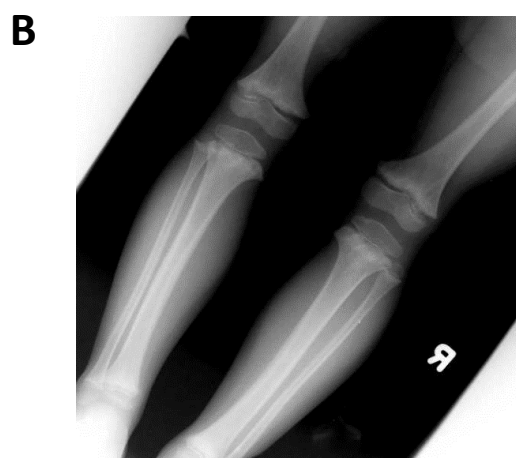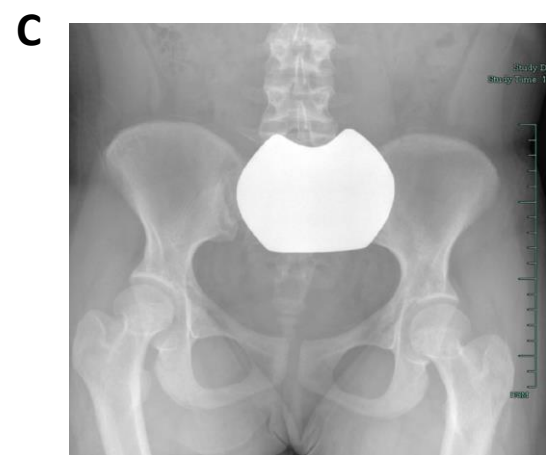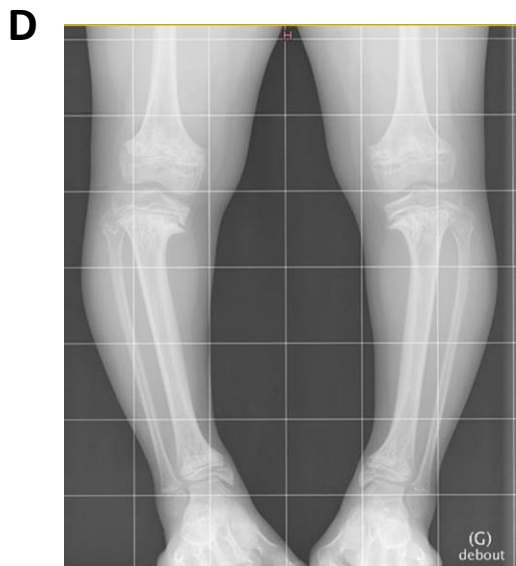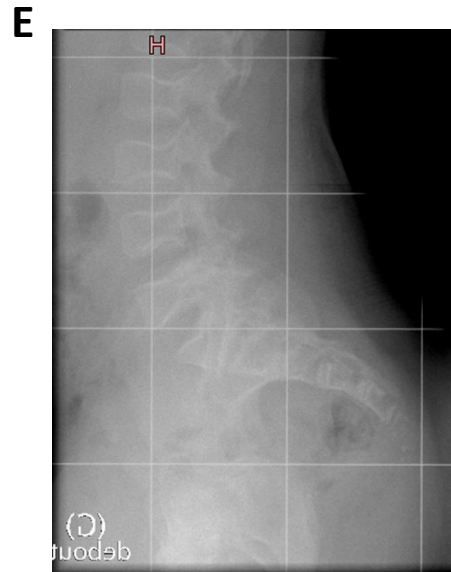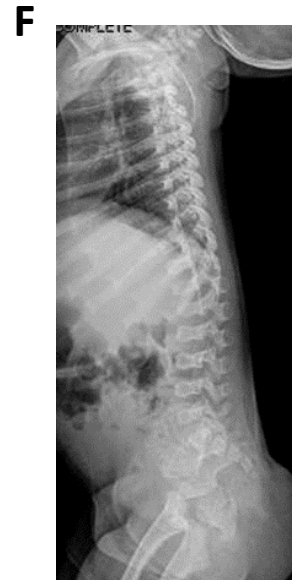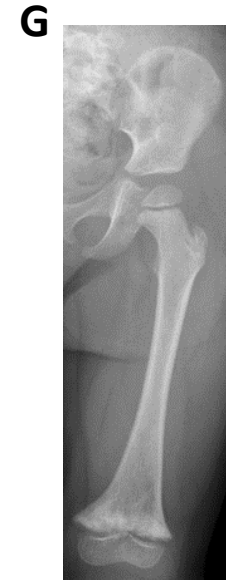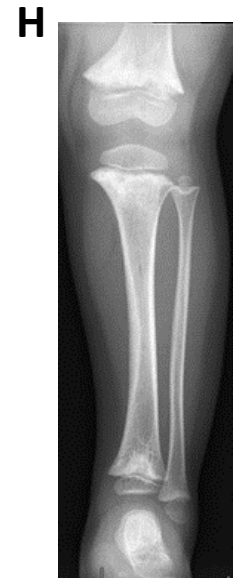

Figure S2. Additional radiographs. (A) Subject 1, 6 years 8 months. Metaphyseal widening and irregularities are apparent in tibia. (B) Subject 1, childhood, age unknown. Metaphyseal striations and irregularities are apparent in tibia and femur. (C) Subject 1, 13 years, 3 month. Femoral necks appear short and wide. (D) Subject 5, 11 years. Metaphyseal striations and irregularities are noted in tibia and femur with varus bowing. (E) Subject 5, 11 years. Platyspondyly and biconcave vertebrae are noted. (F) Subject 8, 1 year 5 months. Platyspondyly noted. Several of the vertebral bodies also have a biconcave shape. Note the distinct junction between anterior and posterior portions of the lumbar vertebral bodies. (G) Subject 8, 4 years 5 months. Widening, sclerosis, and irregularity and mild striations of the distal femoral metaphysis are noted. (H) Subject 8, 4 years 5 months. Widening, sclerosis, and irregularity and mild striations of the proximal tibial metaphysis are noted.

**A**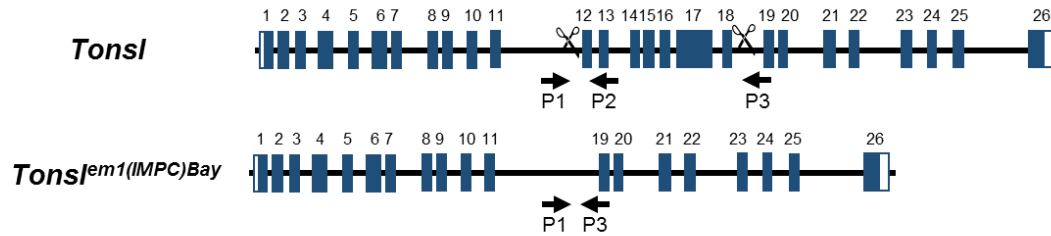**B**

**Distal Break Point**  
Chr15:76,635,014-76,635,013

**Proximal Break Point**  
Chr15:76,632,474-76,632,473

AATTAGTTGAAGCAG|AATTAGTTGCTTCtgg    GAGCAGGACTCCCTTGG|ACTtgg

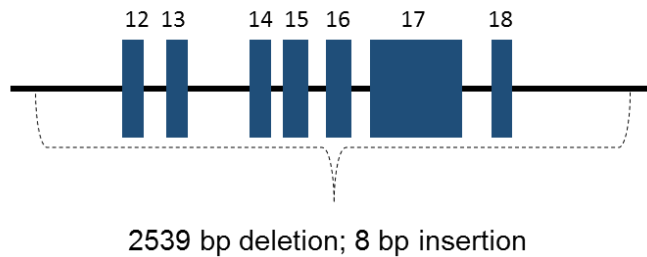**C****Junction Sequence**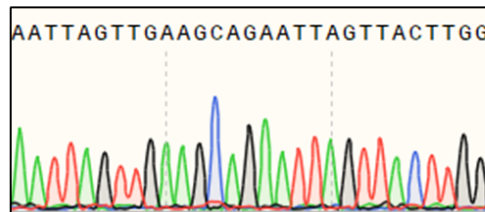

Figure S3. *Tonsl* deletion analysis. (A) Schematic representation of the *Tonsl* locus. The exon/intron structure of the wild-type and null (*Tonsl<sup>em1(IMPC)Bay</sup>*) allele are shown. Exons 12-18 are deleted in the null allele. Blue boxes = coding sequence; White boxes = UTRs. Scissors represent sgRNA target sites. Arrows indicate primers P1, P2, and P3 used for genotyping and sequencing (P1 and P2 amplify the wild-type allele; P1 and P3 amplify the null allele). (B) Distal (Chr15:76,635,014-76,635,013; GRCm38/mm10) and proximal (Chr15:76,632,474-76,632,473; GRCm38/mm10) breakpoints of the deletion in *Tonsl<sup>em1(IMPC)Bay</sup>*. *Tonsl* is oriented in the antisense direction in the mouse genome. Sequence text in black and gray are the sgRNA target and protospacer adjacent motif (PAM) sequences. Red sequence text is an 8 bp insertion that occurred during nonhomologous end joining (NHEJ). (C) Chromatogram showing DNA sequence of the nonhomologous end joining (NHEJ) repair junction.

*tons1*<sup>b1347</sup> c.234-8; p.E80G21Ter

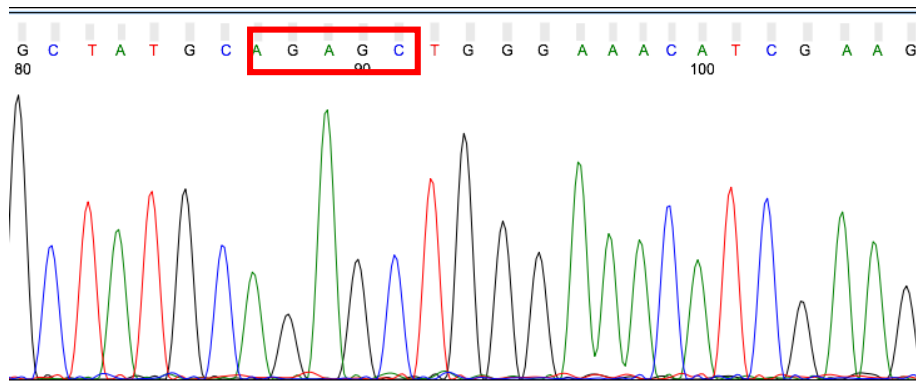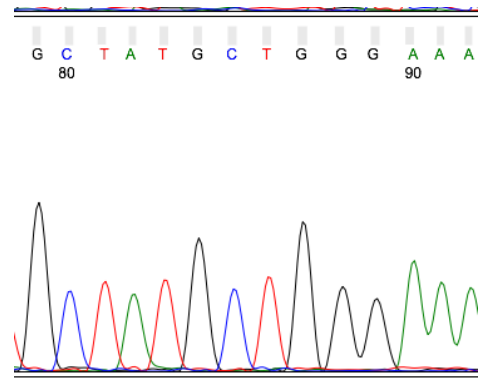

*tons1*<sup>b1348</sup> c.235-47; p.E80S4Ter

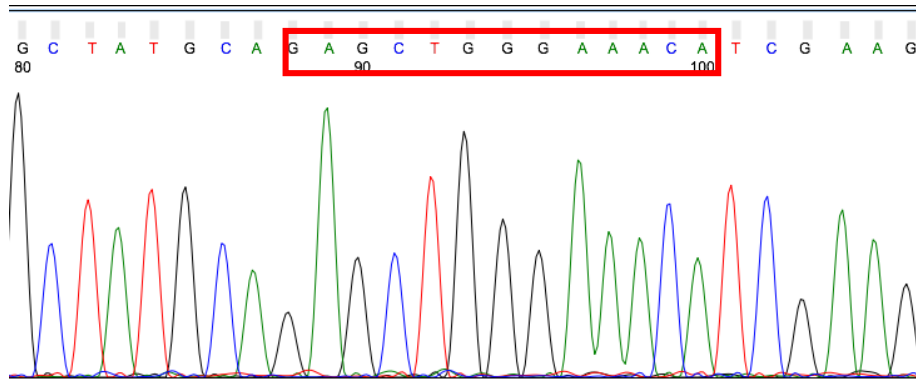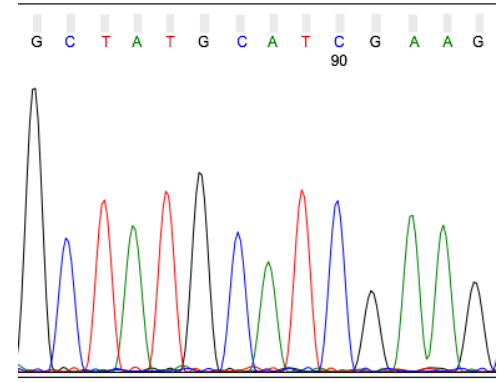

Figure S4. Zebrafish CRISPR mutants. Frameshift alleles of *tons1* affect the two alternate reading frames of exon 3. Bases deleted in each allele are boxed in red; homozygous mutant sequence is presented on the left for each allele.

**Table S1.** Primers used for Sanger sequencing of human *TONSL*

| Exons         | 5' primer             | 3' primer            | Amplicon size (nt) |
|---------------|-----------------------|----------------------|--------------------|
| hTONSLex1-2   | GGCCGACCGTACTTCCC     | CTCCTGCCAGTGCTGCTC   | 636                |
| hTONSLex3     | CAAGGCGAAAGCCAAGG     | AACCTACTCCTGCCCCAGTC | 586                |
| hTONSLex4     | AGCAAGAACAGGGTCTCTGG  | GCTCCAGAAGACGGGATTG  | 373                |
| hTONSLex5     | GGCCCAAAGCTGGAAAC     | ACTTCCTCCAGGAACAAGGG | 249                |
| hTONSLex6-7   | CCGTGTGGCATCAGCAG     | GGCTCACCCCTGCACAC    | 492                |
| hTONSLex8-9   | TCACAGCTTGACAGGTGGTAG | GTCCTGAGGCAGAGACATGG | 524                |
| hTONSLex10-11 | CCGTTGGACGCAGACAG     | CACAGCACACCCCTCTCC   | 578                |
| hTONSLex12-13 | CTGCTAACCTTCACCTCCC   | CACAAACGCACAGCTCCTC  | 380                |
| hTONSLex14-15 | TAGGCTGCAGAGCTCACG    | AGTTGAGCAGGGGCACAG   | 483                |
| hTONSLex16    | ACTCGAAAGGTGAGCCTGG   | CGGGGACTCTCAGCGTAG   | 263                |
| hTONSLex17_1  | GATGCTCCATCACAGGTGG   | AAGGGCTTTGCTGTGGC    | 508                |
| hTONSLex17_2  | ACAGGGAAGCAGCCACAG    | AGTGGGCTCCACCCTACAC  | 509                |
| hTONSLex18    | AGGCAGGTGTAGGGTGGAG   | ACCCTGACATGCAAACACG  | 217                |
| hTONSLex19-20 | GCATTACCCCGGCTGTG     | TGGTGGAGCCTGTGTGC    | 481                |
| hTONSLex21    | GATTCAGAGGGCAGAAAGGG  | GGACCTGCAGAATGGGAAC  | 423                |
| hTONSLex22    | GACTGCCAAGCCAAGCC     | GTCCTGGAAACCCTCAATGC | 312                |
| hTONSLex23    | AGAACTTGGGGTGGGTACAG  | GAGCTCCTCCCAGCAACC   | 313                |
| hTONSLex24    | TGCTGGGAAGCAGGCAG     | CCTTCTCCCATAGGGTCCAG | 212                |
| hTONSLex25    | GCAGCTTTCCTAGTGTTGGG  | CACCTGGGTCTCAGGCAG   | 274                |
| hTONSLex26    | TCCTGGCATCTGTACCTTCC  | AAGCCCGGTCTTACCCC    | 1008               |

**Table S2. Additional Subject Characteristics for Subjects with Clinical Diagnosis of SPONASTRIME Dysplasia**

| Subject ID                     | 1                  | 2                                                                      | 3-1                                                   | 3-2                                    | 4                                                                                          | 5                                                                                | 13                                              | 14                                          | 15                                                                                                                                                                 |
|--------------------------------|--------------------|------------------------------------------------------------------------|-------------------------------------------------------|----------------------------------------|--------------------------------------------------------------------------------------------|----------------------------------------------------------------------------------|-------------------------------------------------|---------------------------------------------|--------------------------------------------------------------------------------------------------------------------------------------------------------------------|
| Sex                            | F                  | F                                                                      | M                                                     | M                                      | F                                                                                          | F                                                                                | M                                               | F                                           | M                                                                                                                                                                  |
| Age at last follow-up          | 7 y 9 m            | 7 y 11 m                                                               | 4 y 9 m                                               | 9 m                                    | 22 y                                                                                       | 23 y                                                                             | 17 y 10 m                                       | 4 y                                         | 11 y                                                                                                                                                               |
| <b>Birth Parameters</b>        |                    |                                                                        |                                                       |                                        |                                                                                            |                                                                                  |                                                 |                                             |                                                                                                                                                                    |
| Gestational Age                | Not available      | Full term                                                              | 40 weeks                                              | 40 weeks                               | 40 weeks                                                                                   | 38 weeks                                                                         | Full term                                       | 39 weeks                                    | 39 weeks                                                                                                                                                           |
| Length                         | Not available      | -3.71                                                                  | -1.16                                                 | -3.41                                  | -2.83                                                                                      | -1.89                                                                            | Not available                                   | -0.23                                       | -2.94                                                                                                                                                              |
| Weight                         | Not available      | -2.70                                                                  | -4.71                                                 | -1.78                                  | -2.18                                                                                      | -1.01                                                                            | Not available                                   | -2.03                                       | -2.11                                                                                                                                                              |
| FOC                            | Not available      | Not available                                                          | Not available                                         | -0.38                                  | -2.32                                                                                      | -0.41                                                                            | Not available                                   | -2.26                                       | Not available                                                                                                                                                      |
| <b>Extra-Skeletal Features</b> |                    |                                                                        |                                                       |                                        |                                                                                            |                                                                                  |                                                 |                                             |                                                                                                                                                                    |
| Dental                         | Unknown            | Short dental roots; Malocclusion with early loss of teeth <sup>a</sup> | Normal                                                | None                                   | Shallow dental roots                                                                       | Malocclusion ; Early loss of teeth; Gingival recession                           | Normal examination                              | Short dental roots                          | Short dental roots; Dental crowding                                                                                                                                |
| Facial Features                | Midface hypoplasia | Midface hypoplasia; Prominent forehead                                 | Midface hypoplasia; Frontal bossing                   | Midface hypoplasia; Prominent forehead | Midface hypoplasia; Frontal bossing; Short philtrum                                        | Midface hypoplasia; Prominent forehead                                           | Midface hypoplasia                              | Frontal bossing; Midface hypoplasia         | Coarse, mid face hypoplasia; Flat, depressed nasal bridge; Short upturned nose and thick full lips; Frontal bossing; Mild dolichocephaly with maxillary hypoplasia |
| Eye                            | Unknown            | Bilateral cataracts (age ~10 years) <sup>a</sup>                       | None                                                  | None                                   | Bilateral cataracts (extracted at age 8 years, 15 years)                                   | Bilateral cataracts (age ~12 years)                                              | Normal                                          | None                                        | Normal                                                                                                                                                             |
| Nose                           | Unknown            | Depressed nasal bridge; Anteverted nares                               | Depressed nasal bridge                                | Depressed nasal bridge                 | Depressed nasal bridge; Anteverted nares                                                   | Depressed nasal bridge; Short nose; Thick alae nasi                              | Short, depressed nasal bridge; Anteverted nares | Concave nasal ridge; Depressed nasal bridge | Short, upturned                                                                                                                                                    |
| Immunologic Abnormalities      | None               | None                                                                   | Not assessed; Parental report of recurrent infections | Low neutrophil count (2 months of age) | Transient hypogammaglobulinemia, Recurrent infections; Poor pneumococcal antibody response | Hypogammaglobulinemia; Recurrent infections; Poor pneumococcal antibody response | Normal                                          | None                                        | Normal                                                                                                                                                             |

| Development  | Normal                                        | Normal                             | Expressive language delay                                                   | Normal                                                                      | Normal                                                       | Normal | Normal                                                                     | Normal | Abnormal findings                                                                                                                                                                                                              |
|--------------|-----------------------------------------------|------------------------------------|-----------------------------------------------------------------------------|-----------------------------------------------------------------------------|--------------------------------------------------------------|--------|----------------------------------------------------------------------------|--------|--------------------------------------------------------------------------------------------------------------------------------------------------------------------------------------------------------------------------------|
| <b>Other</b> | Similarly affected sibling with same variants | Decreased carrying angle of elbows | Glottic and subglottic stenosis requiring tracheostomy (eventually removed) | Left cryptorchidism; subglottic stenosis requiring tracheostomy at 2 months | Possible subglottic stenosis (asymptomatic); Mild osteopenia | None   | Mild joint laxity in fingers; Mild limitation of full extension at elbows. | None   | At age 30 y, weight 40.8 kg (-4.3SD) and height 130.8 cm (-6.2SD). Family history includes two maternal third cousins (12 y/o female, 10 y/o male) with clinical diagnosis of SPONASTRIME dysplasia. Consanguinity was denied. |



**Table S3.** Subjects with clinical diagnosis of SPONASTRIME dysplasia but without Biallelic Variants in *TONSL*

| Subject ID                     | 9 <sup>1</sup>                                                                        | 10 <sup>2</sup>                                                                                                          | 11 <sup>3</sup>                                             | 12                                                              |
|--------------------------------|---------------------------------------------------------------------------------------|--------------------------------------------------------------------------------------------------------------------------|-------------------------------------------------------------|-----------------------------------------------------------------|
| Sex                            | M                                                                                     | M                                                                                                                        | F                                                           | M                                                               |
| Age at last follow-up          | 5 y 9 m                                                                               | 15 y 7 m                                                                                                                 | 14 y                                                        | 15 y 1 m                                                        |
| Height (Z-score)               | -5.6                                                                                  | -5.36                                                                                                                    | -6.4                                                        | -1.61                                                           |
| Weight (Z-score)               | -0.19                                                                                 | -4.09                                                                                                                    | -3.8                                                        | -0.61                                                           |
| FOC (Z-score)                  | Not available                                                                         | 0.10                                                                                                                     | -2.6                                                        | 0.42                                                            |
| Disproportionate Short Stature | Unknown                                                                               | Yes                                                                                                                      | Yes                                                         | No                                                              |
| <b>Birth Parameters</b>        |                                                                                       |                                                                                                                          |                                                             |                                                                 |
| Gestational Age                | Unavailable                                                                           | Full Term                                                                                                                | 39 weeks                                                    | Not Available                                                   |
| Length                         | Unavailable                                                                           | 48.26 cm                                                                                                                 | NA                                                          | Not Available                                                   |
| Weight                         | Unavailable                                                                           | 2807 g                                                                                                                   | -1.3                                                        | Not Available                                                   |
| FOC                            | Unavailable                                                                           | Not Available                                                                                                            | Not Available                                               | Not Available                                                   |
| <b>Clinical Features</b>       |                                                                                       |                                                                                                                          |                                                             |                                                                 |
| Dental                         | Short dental roots                                                                    | Mandibular overbite and wide spaced teeth                                                                                | Extensive dental caries                                     | Misaligned                                                      |
| Facial Features                | Midface hypoplasia; Bifrontal bossing, Prominent mandible                             | Prominent forehead; Midface hypoplasia; Mild prognathism; Mildly coarsened facial appearance                             | Frontal bossing; Midface hypoplasia                         | Mild malar hypoplasia; Low-set ears                             |
| Eye                            | Bilateral subcapsular cataracts at age 11 years                                       | Normal dilated examination; Bilateral epicanthal folds                                                                   | Strabismus                                                  | Epicanthi                                                       |
| Nose                           | Depressed nasal bridge                                                                | Depressed nasal bridge; Anteverted nares                                                                                 | Concave nasal ridge                                         | Depressed and large nasal bridge                                |
| Immunologic                    | Hypogammaglobulinemia; Poor antibody response to tetanus and Haemophilus vaccinations | None known                                                                                                               | Clinically normal                                           | Clinically normal                                               |
| Orthopedic                     | Mild genu valgum; Limitation in extension of elbows; Mild joint laxity                | Bilateral genu valgum; Brachydactyly; Progressive kyphoscoliosis requiring T2-L4 posterior spinal fusion at age 11 years | No other issues                                             | Scoliosis surgery                                               |
| Development                    | Normal                                                                                | Normal                                                                                                                   | Severe intellectual disability                              | Normal                                                          |
| <b>Radiographic Features</b>   |                                                                                       |                                                                                                                          |                                                             |                                                                 |
| Metaphyses                     | Irregularities with striations                                                        | Mild metaphyseal irregularities; Metaphyseal striations evident at age 10 years.                                         | Striations                                                  | Striations with sclerosis                                       |
| Epiphyses                      | Epiphyseal abnormalities                                                              | Normal                                                                                                                   | Normal                                                      | Normal                                                          |
| Spine                          | Platyspondyly                                                                         | Platyspondyly; Ovoid and biconcave vertebral shape,                                                                      | Thoracic kyphosis; Increased lumbar lordosis indentation of | Biconvex vertebrae with reduced posterior vertical height, left |

|                         |                                                                                                                                                |                                                                                                                                                           |                                                          |                                                              |
|-------------------------|------------------------------------------------------------------------------------------------------------------------------------------------|-----------------------------------------------------------------------------------------------------------------------------------------------------------|----------------------------------------------------------|--------------------------------------------------------------|
|                         | Reduced height of vertebral bodies; Anterior portion of the vertebral body is taller than posterior portion with central anterior protuberance | hypoplastic dens without instability                                                                                                                      | vertebral endplates, thickened endplates, reduced height | thoracic scoliosis, surgically fused T4-L1 at age 12.        |
| Other Skeletal Findings | Coxa vara                                                                                                                                      | Short and wide femoral necks; J-shaped sella; Proximal pointing of the 3 <sup>rd</sup> , 4 <sup>th</sup> and 5 <sup>th</sup> metacarpals; Mild osteopenia | Carpal ossification delay; Brachymetacarpia              | Sclerotic zones in phalanges, metacarpal and metatarsal bone |
| <b>Other</b>            |                                                                                                                                                | Mildly limited bilateral elbow extension;<br>Hypernasal voice; Multiple otitis media requiring PE tubes;<br>Juvenile polyp                                |                                                          |                                                              |

<sup>1</sup> Heterozygous variant in *TONSL* noted (NM\_013432.4:c.2800C>T, p.(Arg934Trp), rs75557541) but no second variant detected. Patient was previously published<sup>1,2</sup>.

<sup>2</sup> Heterozygous variant in *TONSL* noted (NM\_013432.4:c.25+2dupT) but no second variant detected.

<sup>3</sup> Patient was previously published<sup>3</sup>.

**Table S4. Additional Subject Characteristics for Subjects without Clinical Diagnosis of SPONASTRIME Dysplasia**

| Subject ID                     | 6                                                                                                                                                              | 7-1                                                                                                         | 7-2                                                                                                                              | 8                                                                                                                                                                                                                                                                                                    |
|--------------------------------|----------------------------------------------------------------------------------------------------------------------------------------------------------------|-------------------------------------------------------------------------------------------------------------|----------------------------------------------------------------------------------------------------------------------------------|------------------------------------------------------------------------------------------------------------------------------------------------------------------------------------------------------------------------------------------------------------------------------------------------------|
| Diagnosis                      | Spondylometaphyseal Dysplasia                                                                                                                                  | Spondylometaphyseal Dysplasia                                                                               | Spondylometaphyseal Dysplasia                                                                                                    | Spondylometaphyseal Dysplasia                                                                                                                                                                                                                                                                        |
| Sex                            | F                                                                                                                                                              | F                                                                                                           | M                                                                                                                                | F                                                                                                                                                                                                                                                                                                    |
| Age at last follow-up          | 12 y                                                                                                                                                           | 10 y 9 m                                                                                                    | 9 y 9 m                                                                                                                          | 5 y 11 m                                                                                                                                                                                                                                                                                             |
| <b>Birth Parameters</b>        |                                                                                                                                                                |                                                                                                             |                                                                                                                                  |                                                                                                                                                                                                                                                                                                      |
| Gestational Age                | 34 weeks                                                                                                                                                       | 39 5/7 weeks                                                                                                | 37 4/7 weeks                                                                                                                     | 35 2/7 weeks                                                                                                                                                                                                                                                                                         |
| Length                         | -2.64                                                                                                                                                          | 0.36                                                                                                        | 1.33                                                                                                                             | -2.54                                                                                                                                                                                                                                                                                                |
| Weight                         | -1.54                                                                                                                                                          | -0.34                                                                                                       | -0.49                                                                                                                            | -1.91                                                                                                                                                                                                                                                                                                |
| FOC                            | -1.10                                                                                                                                                          | 0.33                                                                                                        | -0.47                                                                                                                            | -1.49                                                                                                                                                                                                                                                                                                |
| <b>Extra-Skeletal Features</b> |                                                                                                                                                                |                                                                                                             |                                                                                                                                  |                                                                                                                                                                                                                                                                                                      |
| Dental                         | Delayed tooth eruption, small teeth                                                                                                                            | Delayed tooth eruption; Tooth discoloration; High palate                                                    | Delayed tooth eruption; Tooth discoloration; Upper lateral incisor is malpositioned; High palate                                 | Normal                                                                                                                                                                                                                                                                                               |
| Facial Features                | High forehead, frontal bossing; Hypoplasia of supra-orbital ridges                                                                                             | Short philtrum                                                                                              | Poorly defined philtrum                                                                                                          | Short philtrum                                                                                                                                                                                                                                                                                       |
| Eye                            | Acoria; Deep set eyes; Primary aphakia; Microphthalmia; Short palpebral fissures; Bilateral epicanthal folds; Glaucoma (bilateral) likely secondary to aphakia | Wears glasses                                                                                               | No known abnormalities                                                                                                           | Epicanthal folds with mild synophrys                                                                                                                                                                                                                                                                 |
| Nose                           | Broad and depressed nasal bridge with crease over the bridge; Anteverted nares                                                                                 | Bulbous tip                                                                                                 | Broad and depressed and nasal bridge                                                                                             | Depressed nasal bridge                                                                                                                                                                                                                                                                               |
| Immunologic Abnormalities      | None                                                                                                                                                           | Hypogammaglobulinemia; Vaccine responses untested due to immunoglobulin replacement; Congenital neutropenia | Hypogammaglobulinemia; Vaccine responses untested due to immunoglobulin replacement; Congenital neutropenia; Frequent infections | Transient hypogammaglobulinemia of infancy; Low memory B cell percentages<br>Congenital neutropenia with normocellular bone marrow with myeloid hypoplasia and left shift; Failure to respond to the polysaccharide-restricted serotypes in the 23-valent pneumococcal vaccine; Recurrent infections |
| Development                    | Normal; Vision impairment impacts her motor performance                                                                                                        | Normal                                                                                                      | Normal                                                                                                                           | Mild global delay, now resolved                                                                                                                                                                                                                                                                      |

|              |                                              |                   |                                                                                                |                                                                   |
|--------------|----------------------------------------------|-------------------|------------------------------------------------------------------------------------------------|-------------------------------------------------------------------|
| <b>Other</b> | Osteopenia; Low set ears; High-arched palate | Brittle toe nails | Growth hormone deficiency via glucagon stimulation test; Absence seizures; Dystrophic toenails | Asymmetric renal length; Multiple otitis media requiring PE tubes |
|--------------|----------------------------------------------|-------------------|------------------------------------------------------------------------------------------------|-------------------------------------------------------------------|

**Supplemental References:**

1. Gripp, K.W. *et al.* Expanding the phenotype of SPONASTRIME dysplasia to include short dental roots, hypogammaglobulinemia, and cataracts. *Am J Med Genet A* **146A**, 468-73 (2008).
2. Langer, L.O., Jr., Beals, R.K., LaFranchi, S., Scott, C.I., Jr. & Sockalosky, J.J. Sponastrime dysplasia: five new cases and review of nine previously published cases. *Am J Med Genet* **63**, 20-7 (1996).
3. Camera, G., Camera, A., Di Rocco, M. & Gatti, R. Sponastrime dysplasia: report on two siblings with mental retardation. *Pediatr Radiol* **23**, 611-4 (1993).
